# Supplementary material for: Green-Synthesized Silver and Selenium Nanoparticles Using Berberine: A Comparative Assessment of In Vitro Anticancer Potential on Human Hepatocellular Carcinoma Cell Line (HepG2)
Source: MDPI journal article supplement (doi:10.3390/cells13030287), 2024-02-05
Supplement: s1 [file s1]

**Supplementary data; Table S1 and Figure S1:** Characterization of berberine loaded silver nanoparticles (Ber-AgNPs) and berberine loaded selenium nanoparticles (Ber-SeNPs) determined hydrodynamic diameter by Zetasizer and surface charge by Zeta potential.

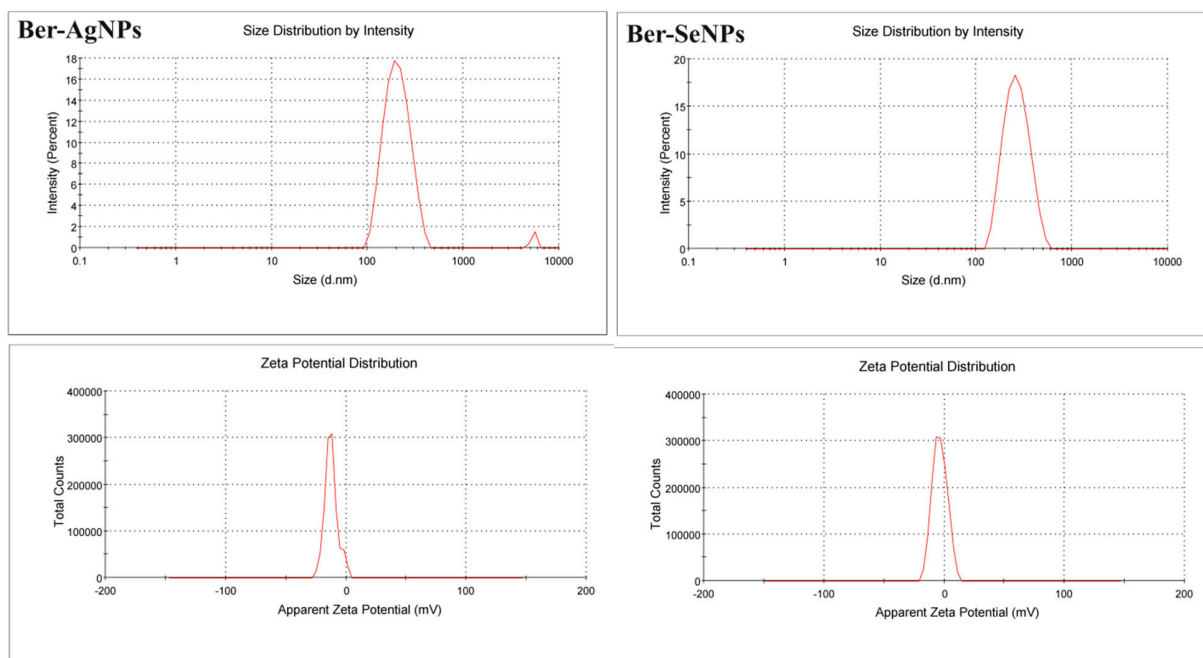

| NPs       | Hydrodynamic diameter (nm) | Surface charge (mV) |
|-----------|----------------------------|---------------------|
| Ber-AgNPs | 215.4±10.8                 | -3.73               |
| Ber-SeNPs | 171.5±4.2                  | -12.4               |
